# Supplementary material for: GADD45B regulates the carcinogenesis process of chronic atrophic gastritis and the metabolic pathways of gastric cancer
Source: PubMed Central journal article supplement (PMC10441793; doi:10.3389/fendo.2023.1224832), 2023-08-07

# 1. Single cell annotation of chronic Atrophic gastritis matrix

## (1) B cell

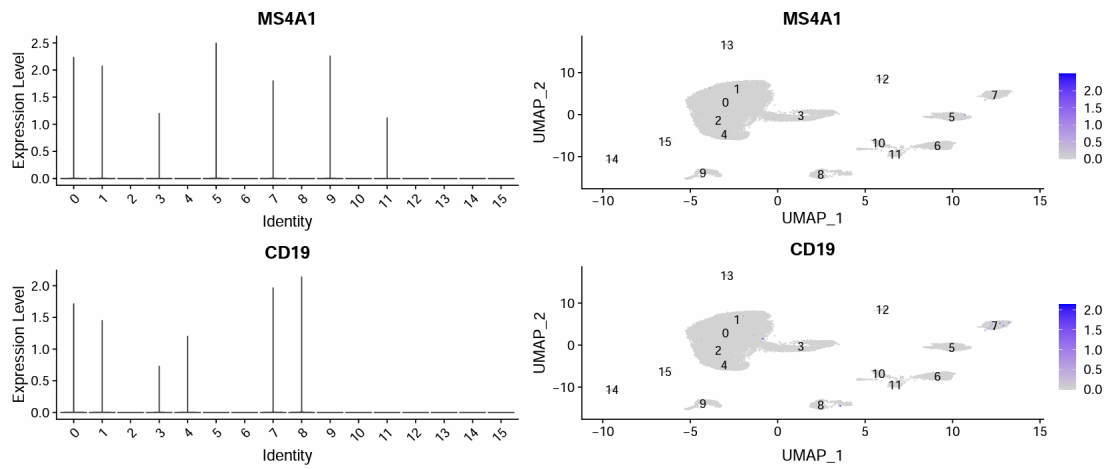

## (2) CMP

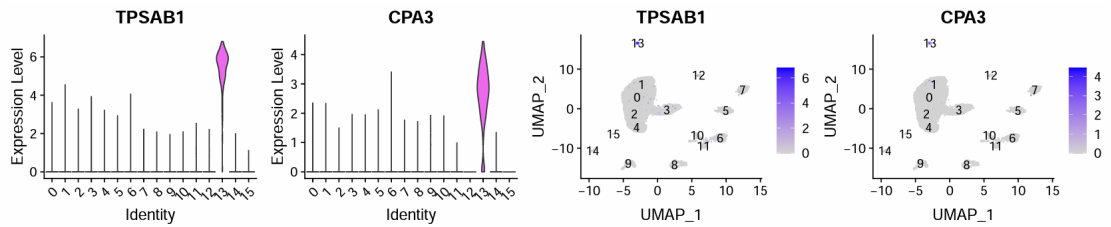

## (3) Endothelial cell

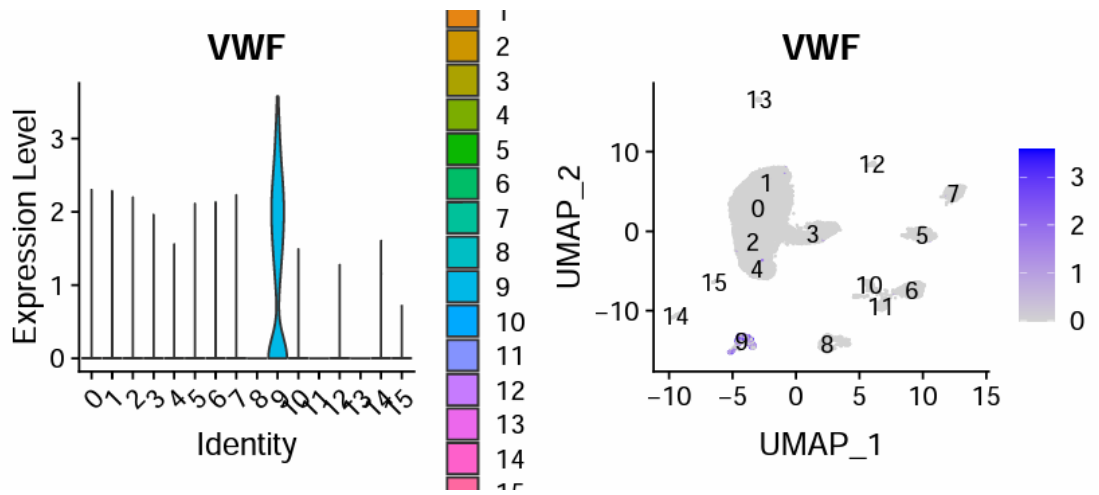

#### (4) Epithelial cell

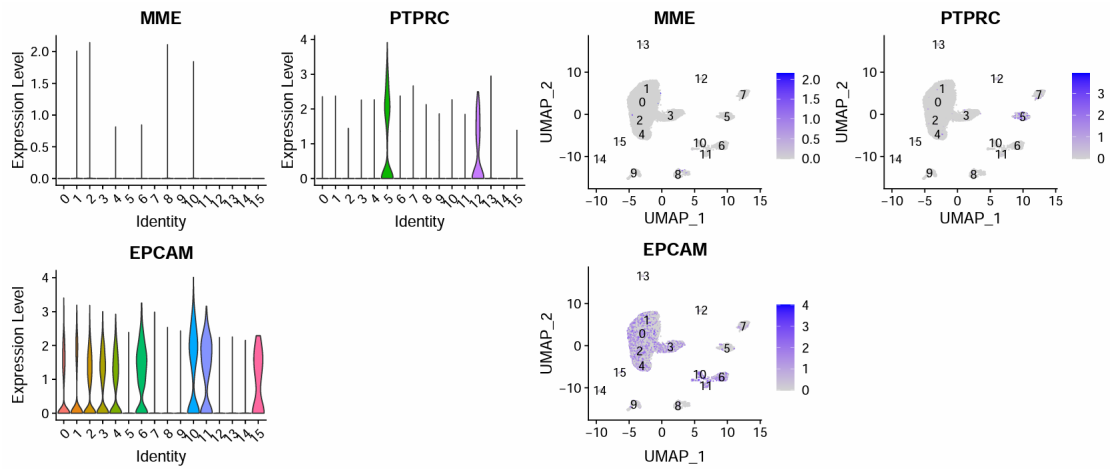

#### (5) Fibroblast

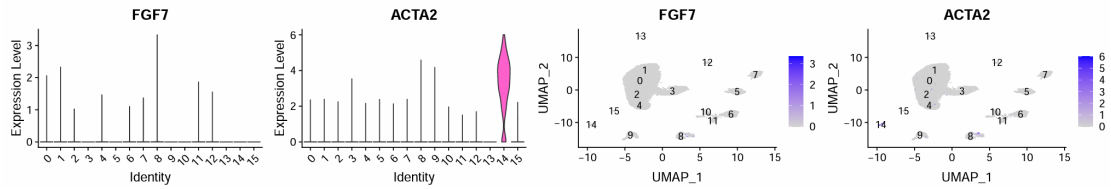

#### (6) Macrophage

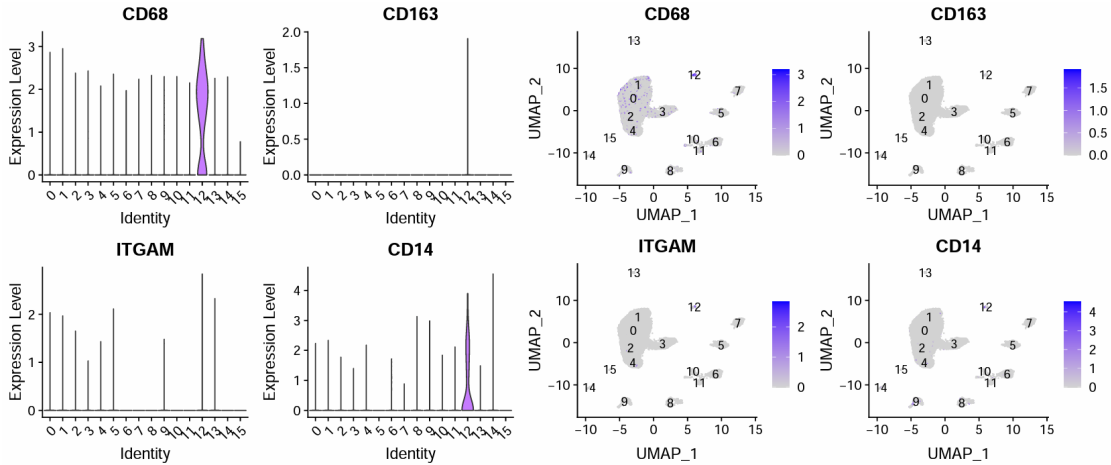

(7) CD8+T cell

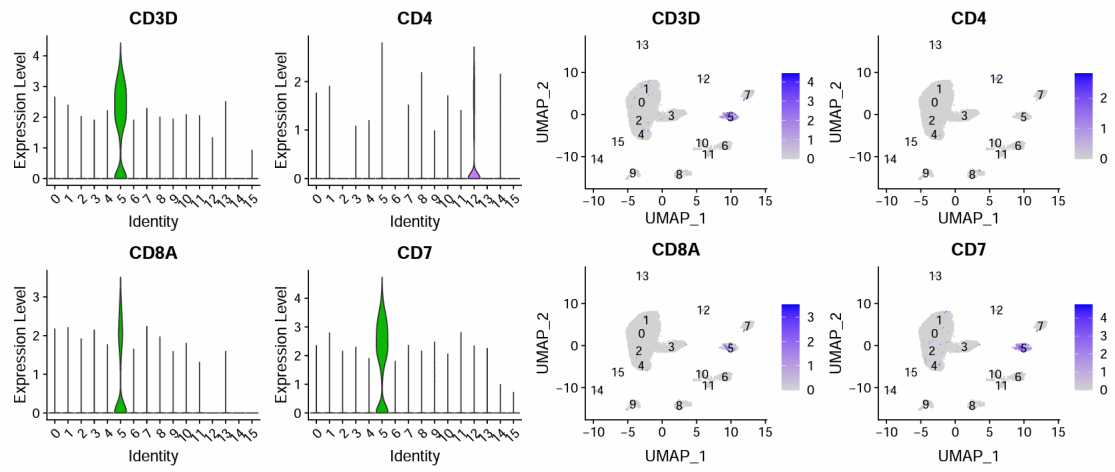

(8) TSC

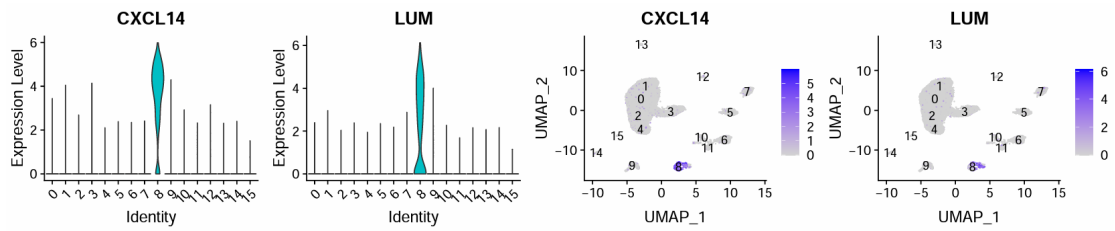

## 2. Single cell annotation of gastric cancer matrix

### (1) B cell

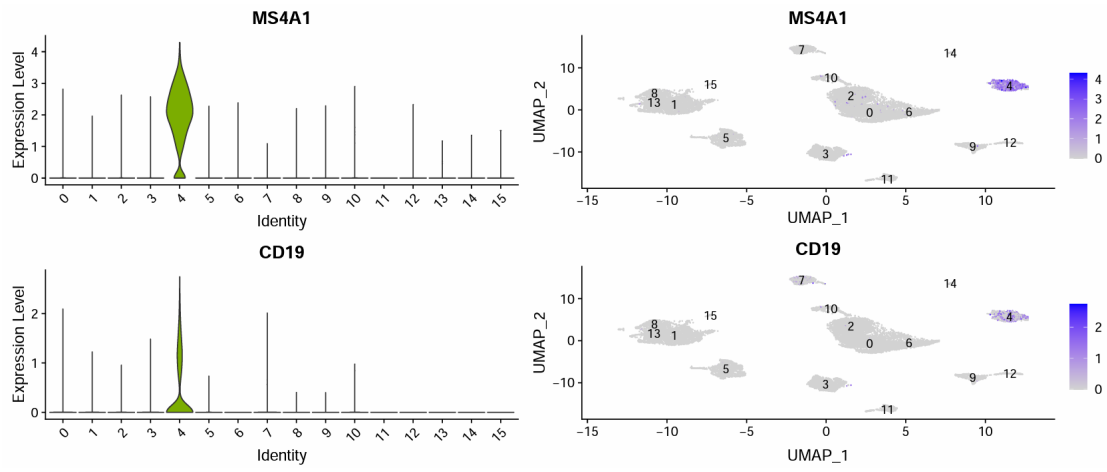

### (2) CMP

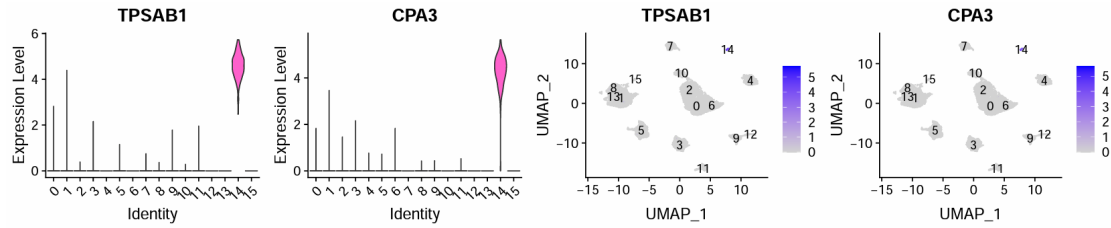

### (3) Endothelial cell

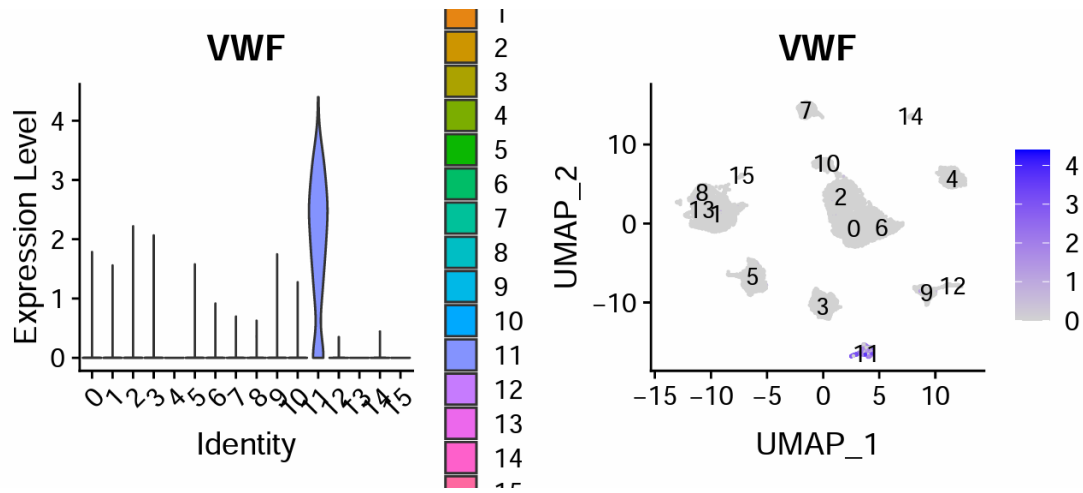

### (4) Fibroblast

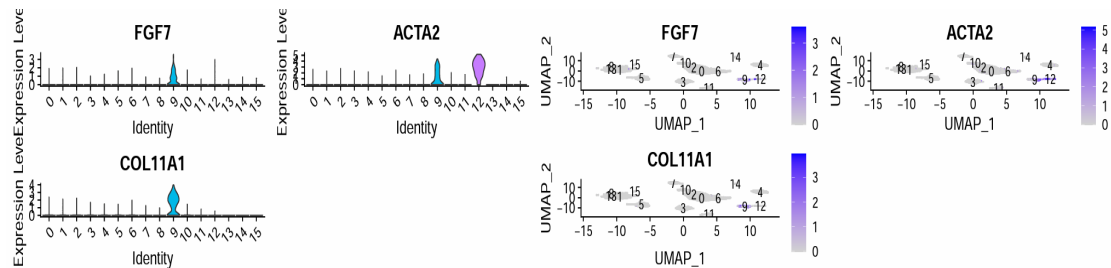

### (5) Macrophage

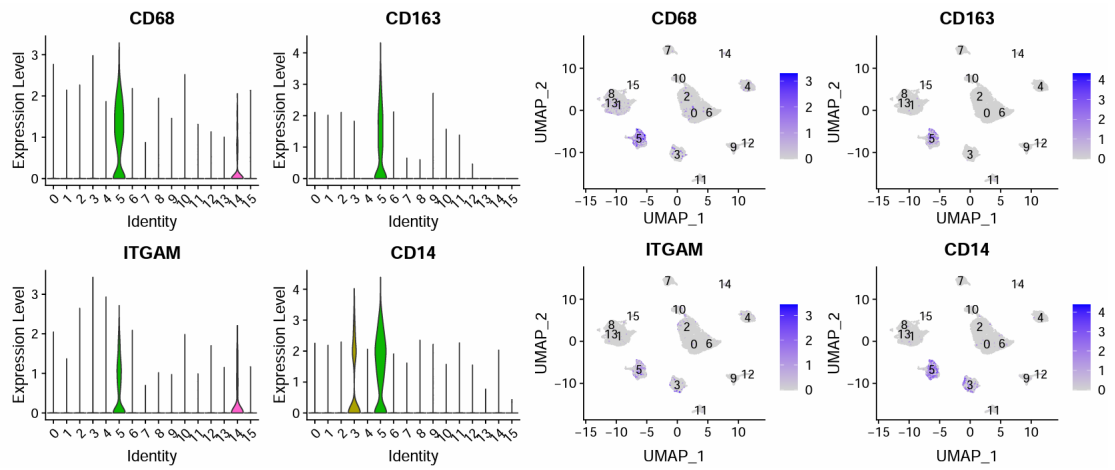

### (6) Neutrophil

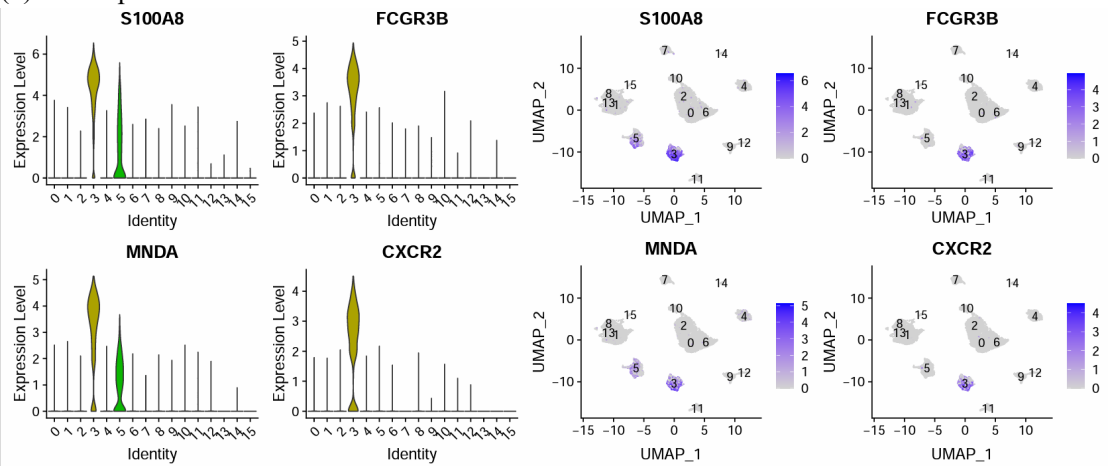

### (7) Plasma

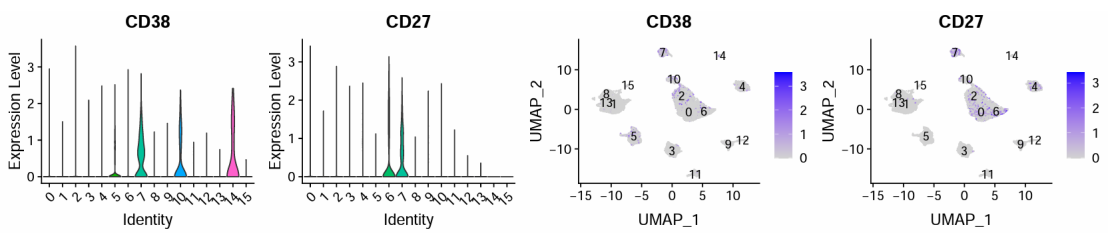

### (8) Progenitor

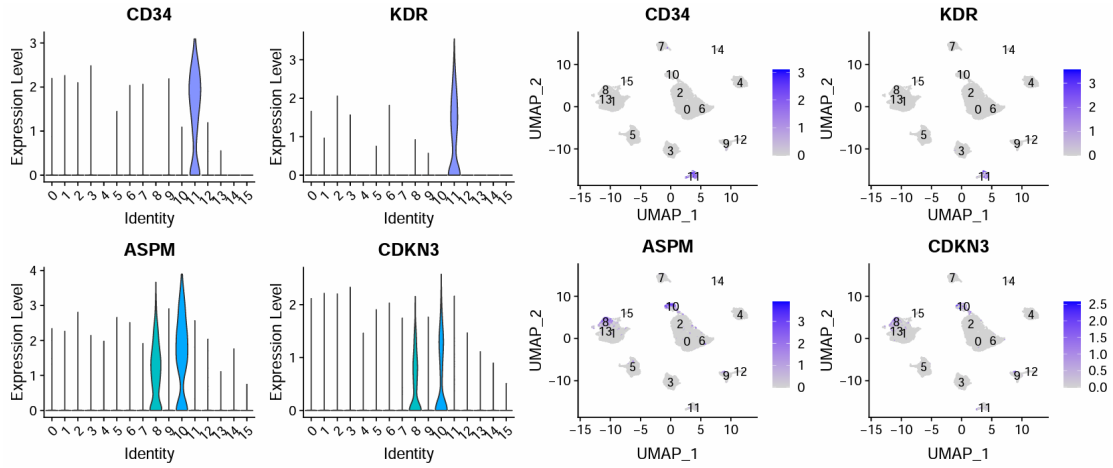

(9) CD4+T cell and CD8+T cell

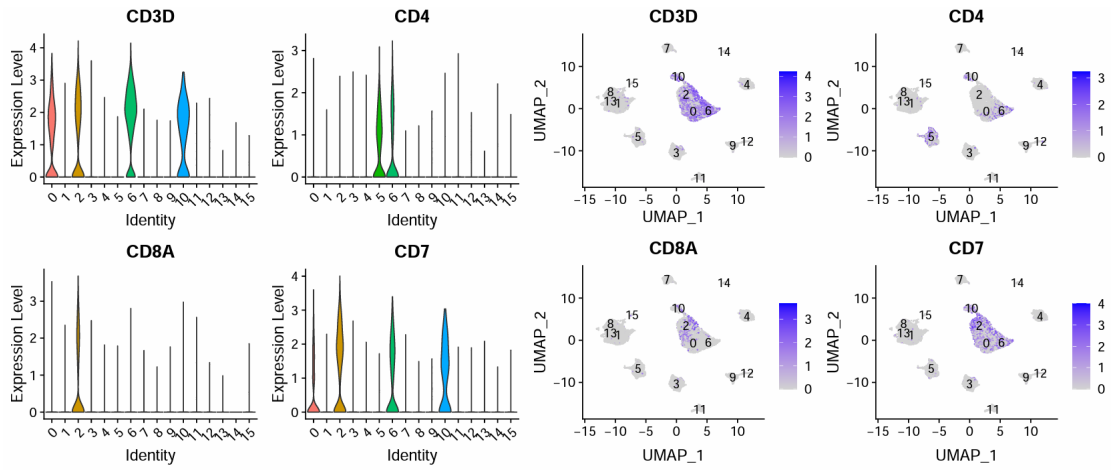

(10) Epithelial

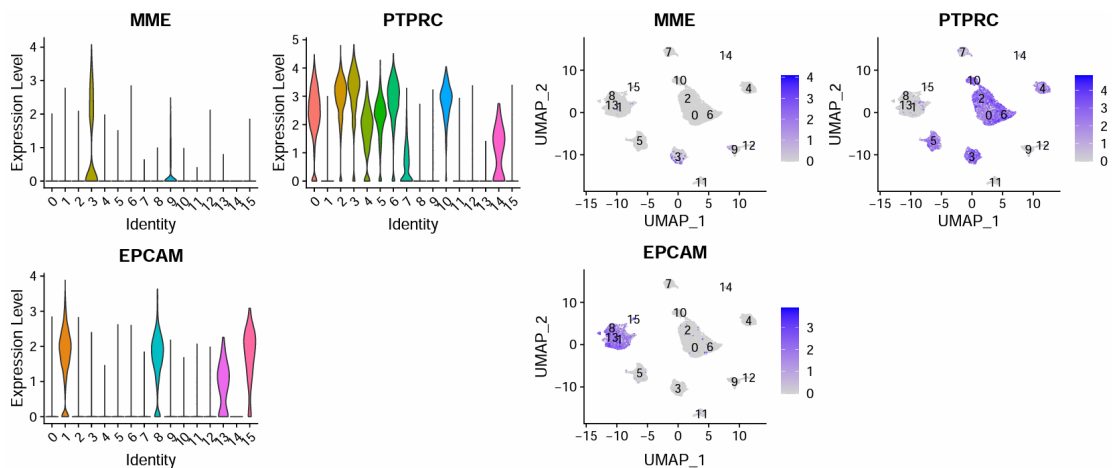

Supplement: Image_2.pdf [file Image_2.pdf]
